# Supplementary material for: Effects of intergenerational transmission of small intestinal bacteria cultured from stunted Bangladeshi children with enteropathy
Source: PubMed Central journal article supplement — bioRxiv. 2025 Nov 22:2024.11.01.621574. Originally published 2024 Nov 3. Preprint. [Version 3] doi: 10.1101/2024.11.01.621574 (PMC11566026; doi:10.1101/2024.11.01.621574), 2025-11-22
Supplement: NIHPP2024.11.01.621574v1-supplement-7.pdf [file NIHPP2024.11.01.621574v1-supplement-7.pdf]

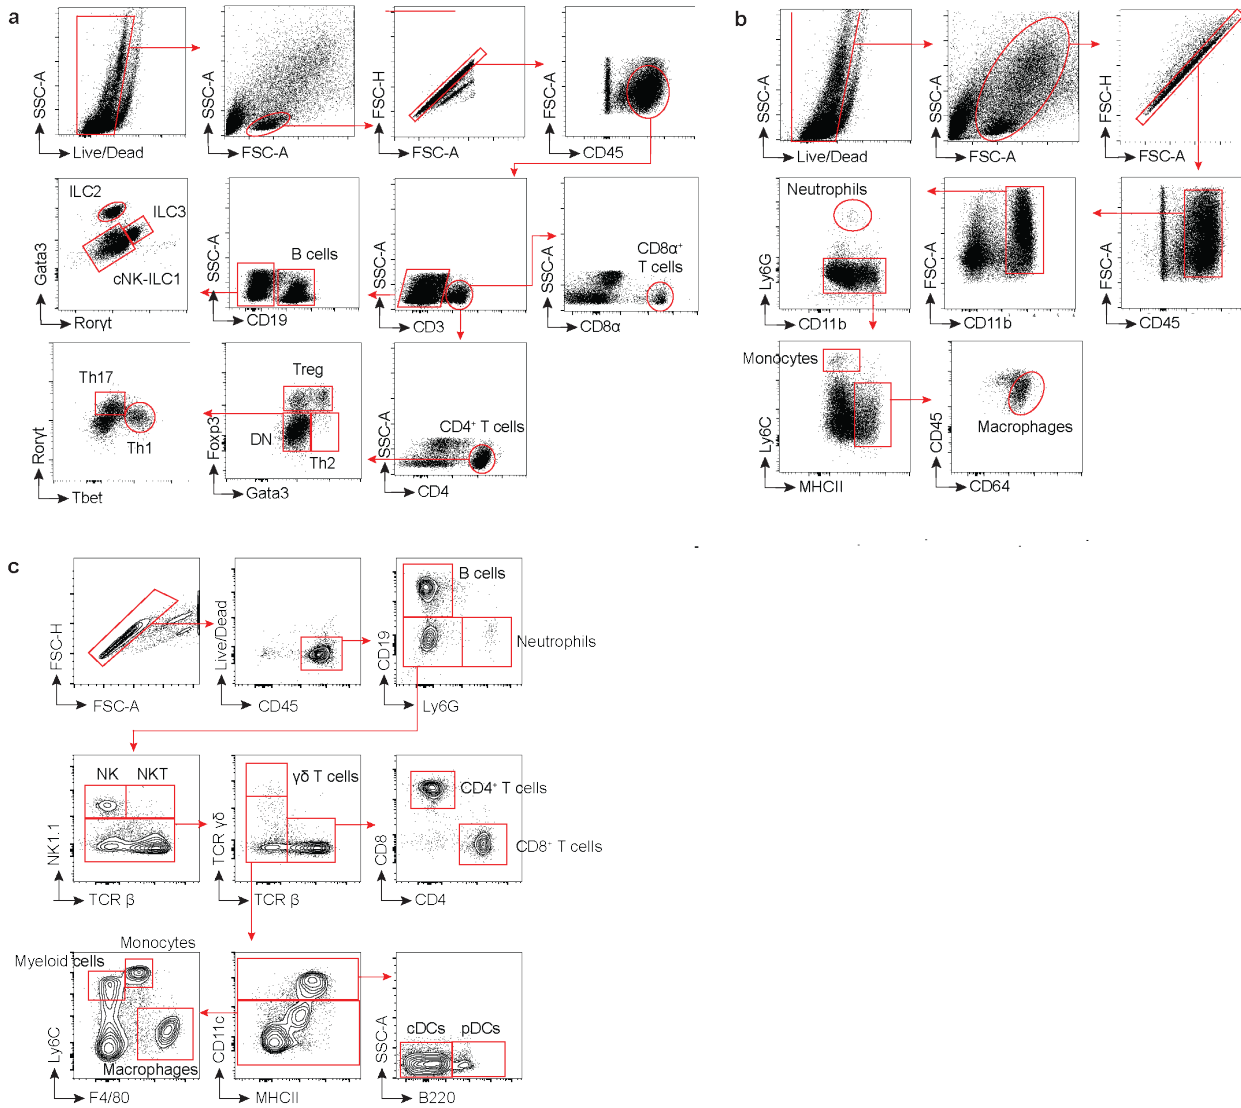

**Supplementary Fig. 1. Gating strategies for flow cytometry. a,b,** Representative gating strategy for quantifying lymphoid (**a**) and myeloid (**b**) immune cells in the intestinal lamina propria. **c,** Representative gating strategies for meninges and spleen. See **Extended Data Table 5** for antibodies used.
